# Supplementary material for: Kagome-type isostructural 3D-transition metal fluorosulfates with spin 3/2 and 1: synthesis, structure and characterization
Source: Royal Society of Chemistry journal article supplement (doi:10.1039/c6dt03173k), 2016-01-01
Supplement: c6dt03173k1.pdf [file c6dt03173k1.pdf]

Supporting Information for:

## Kagome-type Isostructural 3D-Transition Metal Fluorosulfates with Spin 3/2 and 1: Synthesis, Structure and characterization

Subba R. Marri,<sup>a</sup> Jitendra Kumar,<sup>a</sup> Kitt Panyarat,<sup>b</sup> Satoshi Horike<sup>c</sup> and J. N. Behera<sup>a\*</sup>

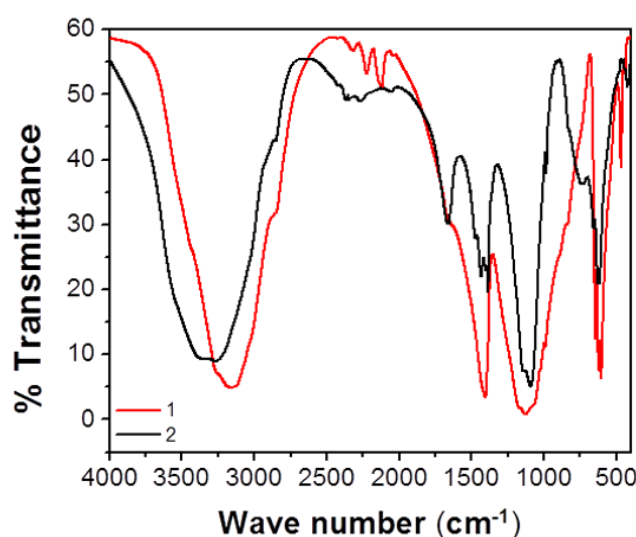

Fig. S1 FTIR spectra of  $[\text{H}_3\text{O}][\text{Co}(\text{SO}_4)\text{F}]$ , 1 and  $[\text{H}_3\text{O}][\text{Ni}(\text{SO}_4)\text{F}]$ , 2.

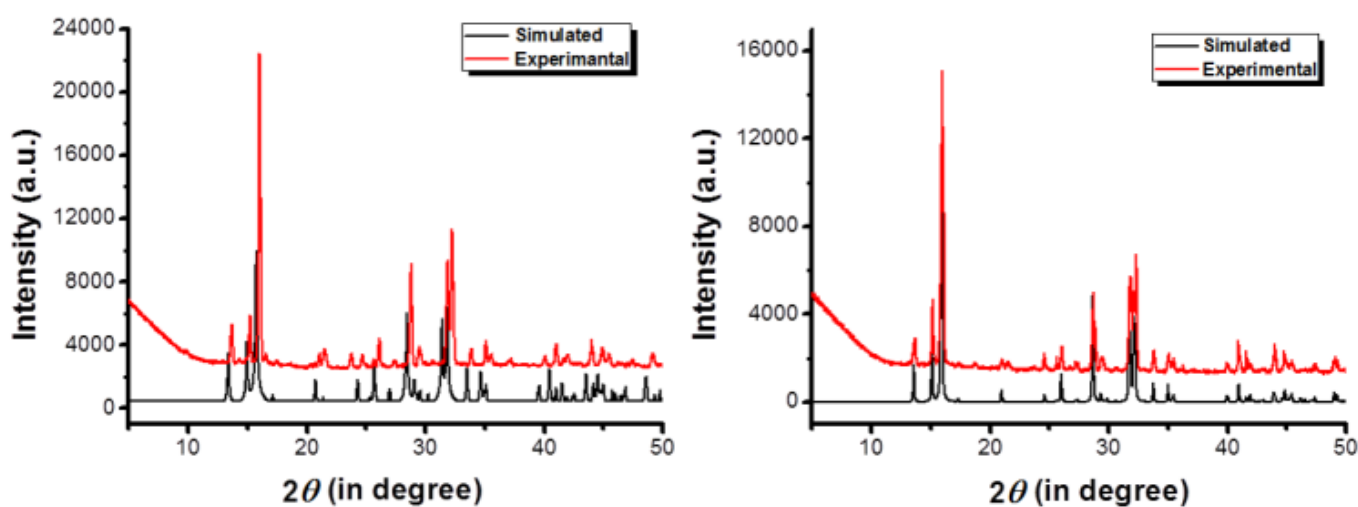

Fig.S2 PXRD pattern of  $[\text{H}_3\text{O}][\text{Co}(\text{SO}_4)\text{F}]$ , 1 and  $[\text{H}_3\text{O}][\text{Ni}(\text{SO}_4)\text{F}]$ , 2 showing the phase purity of as synthesized materials.

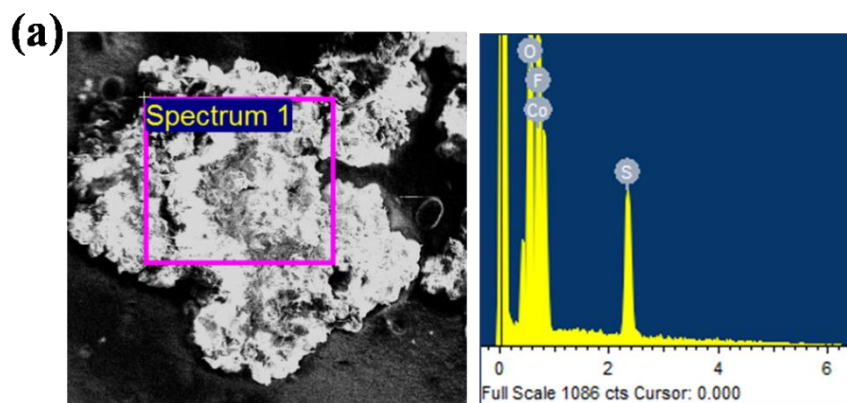

| Element | Weight (%) | Atomic (%) |
|---------|------------|------------|
| O K     | 36.97      | 37.08      |
| F K     | 24.31      | 28.48      |
| S K     | 18.40      | 16.77      |
| Co L    | 20.32      | 17.67      |
| Total   | 100.00     |            |

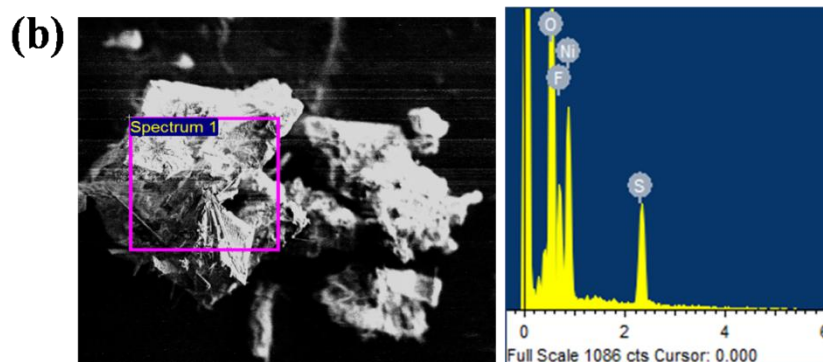

| Element | Weight (%) | Atomic (%) |
|---------|------------|------------|
| O K     | 46.48      | 54.57      |
| F K     | 16.60      | 24.15      |
| S K     | 17.53      | 10.16      |
| Ni L    | 18.89      | 11.12      |
| Total   | 100.00     |            |

Fig. S3. EDAX analysis of (a) of  $[\text{H}_3\text{O}][\text{Co}(\text{SO}_4)\text{F}]$ , 1, (b)  $[\text{H}_3\text{O}][\text{Ni}(\text{SO}_4)\text{F}]$ , 2

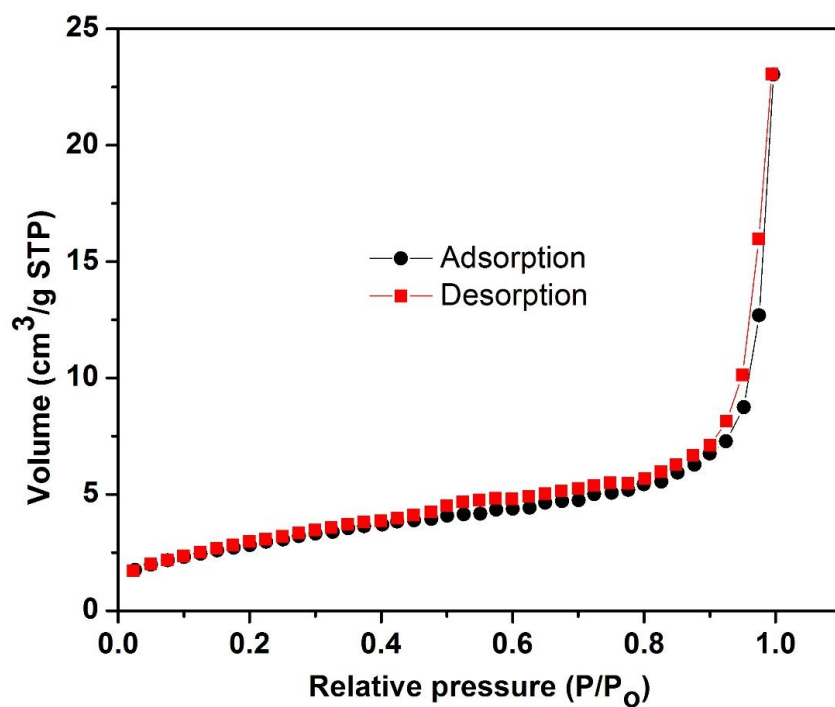

Fig. S5 N<sub>2</sub> adsorption isotherm for Compound [H<sub>3</sub>O][Ni(SO<sub>4</sub>)F] · 2

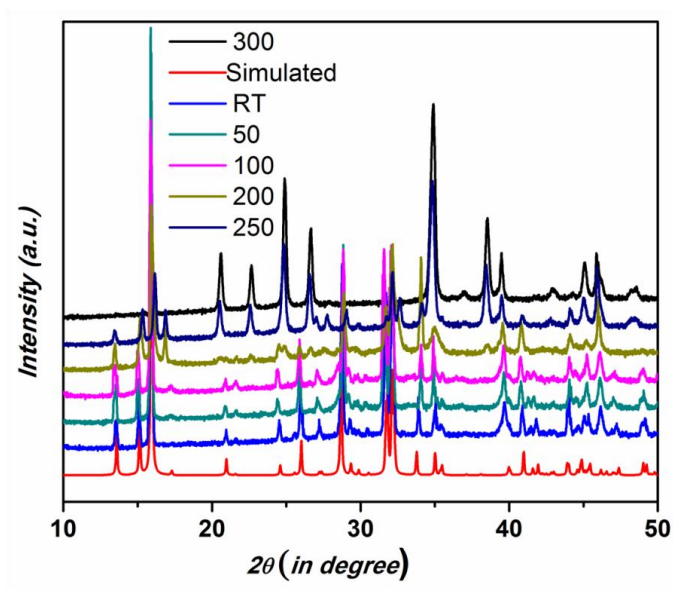

Fig. S6 Temperature dependent PXRD patterns [H<sub>3</sub>O][Ni(SO<sub>4</sub>)F] · 2

Table S1. Complete list of bond lengths [Å] and bond angles [°] for 1-2

| [H <sub>3</sub> O][Co(SO <sub>4</sub> )F], 1 |            |             |            |                |            |
|----------------------------------------------|------------|-------------|------------|----------------|------------|
| Co1-F1                                       | 1.991(4)   | Co2-F1      | 1.999(4)   | S1-O1          | 1.472(4)   |
| Co1-O1                                       | 2.056(4)   | Co2-O4      | 2.073(4)   | S1-O2          | 1.468(4)   |
| Co1-O3                                       | 2.154(4)   | Co2-O2      | 2.171(4)   | S2-O3          | 1.467(4)   |
|                                              |            |             |            | S2-O4          | 1.479(4)   |
| F1-Co1-F1i                                   | 180.0(2)   | F1-Co2-F1ii | 88.0(2)    | O1-S1-O1iii    | 106.1(4)   |
| F1-Co1-O1                                    | 91.06(17)  | F1-Co2-O2   | 92.94(17)  | O1-S1-O2       | 110.9(2)   |
| F1-Co1-O1i                                   | 88.94(17)  | F1-Co2-O2ii | 91.23(18)  | O1-S1-O2iii    | 110.3(3)   |
| F1-Co1-O3                                    | 92.82(15)  | F1-Co2-O4   | 89.21(17)  | O2-S1-O2iii    | 108.4(4)   |
| F1-Co1-O3i                                   | 87.18(15)  | F1-Co2-O4ii | 177.05(17) | O3-S2-O3iv     | 109.4(4)   |
| O1-Co1-O1i                                   | 180.00(17) | O2-Co2-O2ii | 174.2(2)   | O3-S2-O4       | 111.1(2)   |
| O1-Co1-O3                                    | 88.77(17)  | O2-Co2-O4   | 88.13(17)  | O3-S2-O4iv     | 109.0(3)   |
| O1-Co1-O3i                                   | 91.23(17)  | O2-Co2-O4ii | 87.91(17)  | O4-S2-O4iv     | 107.2(4)   |
| O3-Co1-O3i                                   | 180.00(4)  | O4-Co2-O4ii | 93.6(3)    | Co1-F1-Co2     | 126.2(2)   |
| S1-O1-Co1                                    | 135.6(3)   | S1-O2-Co2   | 136.3(3)   | S2-O3-Co1      | 134.3(3)   |
| S2-O4-Co2                                    | 136.4(3)   |             |            |                |            |
| [H <sub>3</sub> O][Ni(SO <sub>4</sub> )F], 2 |            |             |            |                |            |
| Ni1-F1                                       | 1.966(3)   | Ni2-F1      | 1.968(4)   | S1-O1          | 1.474(4)   |
| Ni1-O3                                       | 2.051(4)   | Ni2-O2      | 2.033(4)   | S1-O2vi        | 1.470(4)   |
| Ni1-O1                                       | 2.138(4)   | Ni2-O4      | 2.110(4)   | S2-O4          | 1.470(4)   |
|                                              |            |             |            | S2-O3vi        | 1.479(4)   |
| F1-Ni1-F1v                                   | 89.3(2)    | F1-Ni2-F1vi | 180.0(2)   | O1-S1-O1vii    | 108.4(3)   |
| F1-Ni1-O1                                    | 92.88(16)  | F1-Ni2-O2   | 89.01(16)  | O1-S1-O2vi     | 111.1(2)   |
| F1-Ni1-O1v                                   | 91.16(17)  | F1-Ni2-O2vi | 90.99(16)  | O1-S1-O2viii   | 110.2(2)   |
| F1-Ni1-O3                                    | 88.93(16)  | F1-Ni2-O4   | 87.41(15)  | O2vi-S1-O2viii | 105.9(4)   |
| F1-Ni1-O3v                                   | 178.07(16) | F1-Ni2-O4vi | 92.59(15)  | O4-S2-O4ix     | 108.9(3)   |
| O1-Ni1-O1v                                   | 174.3(2)   | O2-Ni2-O2vi | 180.00(15) | O4-S2-O3vi     | 111.0(2)   |
| O1-Ni1-O3                                    | 88.24(17)  | O2-Ni2-O4   | 88.98(16)  | O4-S2-O3x      | 109.1(2)   |
| O1-Ni1-O3v                                   | 87.84(16)  | O2-Ni2-O4vi | 91.02(16)  | O3vi-S2-O3x    | 107.7(4)   |
| O3-Ni1-O3v                                   | 92.9(2)    | O4-Ni2-O4vi | 180.0(2)   | Ni1-F1-Ni2     | 127.27(19) |
| S1-O1-Ni1                                    | 136.1(3)   | S1vi-O2-Ni2 | 134.8(3)   | S2vi-O3-Ni1    | 136.0(3)   |
| S2-O4-Ni2                                    | 133.8(3)   |             |            |                |            |

Symmetry elements (i)  $-x+1, -y, -z$ ; (ii)  $x, -y+1/2, -z+1/2$ ; (iii)  $x, -y+1/2, -z-1/2$ ; (iv)  $-x+3/2, -y, z$ ; (v)  $x, -y+1/2, -z+1/2$ ; (vi)  $-x+1, -y, -z$ ; (vii)  $x, -y+1/2, -z-1/2$ ; (viii)  $-x+1, y+1/2, z-1/2$ ; (ix)  $-x+1/2, -y, z$ ; (x)  $x-1/2, y, -z$ .

Table S2. Atomic coordinates (x 104) and equivalent isotropic displacement parameters ( $\text{\AA}^2 \times 103$ ) for 1-2. U(eq) is defined as one third of the trace of the orthogonalized Uij tensor.

|                                              | x       | y       | z       | U(eq) |      | x        | y        | z        | U(eq) |
|----------------------------------------------|---------|---------|---------|-------|------|----------|----------|----------|-------|
| [H <sub>3</sub> O][Co(SO <sub>4</sub> )F], 1 |         |         |         |       |      |          |          |          |       |
| Co1                                          | 5000    | 0       | 0       | 11(1) | O1   | 5030(3)  | 1430(4)  | -2081(7) | 17(1) |
| Co2                                          | 6269(1) | 2500    | 2500    | 10(1) | O2   | 6352(3)  | 2770(4)  | -752(7)  | 17(1) |
| S1                                           | 5701(1) | 2500    | -2500   | 12(1) | O4   | 7345(3)  | 1097(4)  | 2202(7)  | 19(1) |
| S2                                           | 7500    | 0       | 874(3)  | 11(1) | O3   | 6610(3)  | -221(4)  | -409(6)  | 15(1) |
| F1                                           | 5178(3) | 1209(4) | 2266(7) | 23(1) | O1Wa | 3552(11) | 1836(13) | 4420(20) | 41(4) |
|                                              |         |         |         |       | O1Wb | 3680(10) | 716(14)  | 4650(20) | 45(4) |
| [H <sub>3</sub> O][Ni(SO <sub>4</sub> )F], 2 |         |         |         |       |      |          |          |          |       |
| Ni1                                          | 6267(1) | 2500    | 2500    | 9(1)  | O1   | 6348(3)  | 2778(4)  | -730(6)  | 15(1) |
| Ni2                                          | 5000    | 0       | 0       | 10(1) | O2   | 4994(3)  | -1425(4) | 2077(6)  | 14(1) |
| S1                                           | 5686(1) | 2500    | -2500   | 10(1) | O3   | 7353(3)  | 1112(4)  | 2197(6)  | 17(1) |
| S2                                           | 2500    | 0       | -865(3) | 9(1)  | O4   | 3403(3)  | 207(4)   | 441(6)   | 14(1) |
| F1                                           | 5192(3) | 1207(3) | 2253(6) | 19(1) | O1Wa | 3535(8)  | 1879(9)  | 4378(18) | 37(4) |
|                                              |         |         |         |       | O1Wb | 3663(8)  | 693(10)  | 4654(17) | 40(4) |

Table S3. Anisotropic displacement parameters ( $\text{\AA}^2 \times 103$ ) for 1-2. The anisotropic displacement factor exponent takes the form:  $-2\pi^2 [h^2 a^{*2} U_{11} + \dots + 2hk a^* b^* U_{12}]$ 

|                                              | U11   | U22   | U33   | U23   | U13   | U12   |      | U11   | U22    | U33   | U23   | U13   | U12    |
|----------------------------------------------|-------|-------|-------|-------|-------|-------|------|-------|--------|-------|-------|-------|--------|
| [H <sub>3</sub> O][Co(SO <sub>4</sub> )F], 1 |       |       |       |       |       |       |      |       |        |       |       |       |        |
| Co1                                          | 12(1) | 9(1)  | 13(1) | 1(1)  | -1(1) | -2(1) | O1   | 20(2) | 17(2)  | 14(2) | 7(2)  | -4(2) | -7(2)  |
| Co2                                          | 9(1)  | 10(1) | 11(1) | -1(1) | 0     | 0     | O2   | 18(2) | 21(2)  | 12(2) | 0(2)  | -2(2) | -4(2)  |
| S1                                           | 13(1) | 11(1) | 11(1) | 1(1)  | 0     | 0     | O4   | 21(2) | 17(2)  | 19(2) | -7(2) | -4(2) | 9(2)   |
| S2                                           | 9(1)  | 11(1) | 11(1) | 0     | 0     | 2(1)  | O3   | 9(2)  | 21(2)  | 17(2) | -4(2) | -3(1) | 0(2)   |
| F1                                           | 19(2) | 20(2) | 29(2) | -8(2) | 6(2)  | -9(1) | O1Wa | 39(7) | 43(8)  | 42(8) | -2(6) | 9(6)  | -16(6) |
|                                              |       |       |       |       |       |       | O1Wb | 37(7) | 60(10) | 38(7) | -6(6) | 9(6)  | -7(6)  |
| [H <sub>3</sub> O][Ni(SO <sub>4</sub> )F], 2 |       |       |       |       |       |       |      |       |        |       |       |       |        |
| Ni1                                          | 9(1)  | 9(1)  | 10(1) | -1(1) | 0     | 0     | O1   | 16(2) | 17(2)  | 10(2) | 0(2)  | -1(2) | -4(2)  |
| Ni2                                          | 10(1) | 7(1)  | 12(1) | 1(1)  | -1(1) | -1(1) | O2   | 18(2) | 14(2)  | 11(2) | 7(2)  | -4(2) | -7(2)  |
| S1                                           | 10(1) | 9(1)  | 10(1) | 1(1)  | 0     | 0     | O3   | 17(2) | 17(2)  | 16(2) | -7(2) | -2(2) | 7(2)   |
| S2                                           | 9(1)  | 10(1) | 9(1)  | 0     | 0     | 2(1)  | O4   | 10(2) | 17(2)  | 14(2) | -2(2) | -3(1) | -1(2)  |
| F1                                           | 17(2) | 15(2) | 23(2) | -4(1) | 4(2)  | -6(1) | O1Wa | 37(7) | 31(6)  | 42(7) | 3(5)  | 7(5)  | -8(5)  |
|                                              |       |       |       |       |       |       | O1Wb | 36(7) | 54(8)  | 32(7) | -3(5) | 9(5)  | -11(6) |

Table S4. Performance indicators for water-mediated proton-conductor

| Compound                                                                                                                                                                | Proton conductivity (S Cm <sup>-1</sup> ) | Activation energy (eV)               | Temperature (°C) and Relative humidity (%) | Reference |
|-------------------------------------------------------------------------------------------------------------------------------------------------------------------------|-------------------------------------------|--------------------------------------|--------------------------------------------|-----------|
| [Mo <sub>5</sub> P <sub>2</sub> O <sub>23</sub> ][Cu(phen)(H <sub>2</sub> O)] <sub>3</sub> ·5 H <sub>2</sub> O phen=phenanthroline                                      | 2.2×10 <sup>-5</sup>                      | 0.23                                 | 28 °C, 98 % RH                             | 1         |
| (NH <sub>4</sub> ) <sub>2</sub> (adp)[Zn <sub>2</sub> (ox) <sub>3</sub> ]·3 H <sub>2</sub> O adp=adipate                                                                | 8×10 <sup>-3</sup>                        | 0.63                                 | 25 °C, 98 % RH                             | 2         |
| V[Cr(CN) <sub>6</sub> ] <sub>2/3</sub> ·nH <sub>2</sub> O                                                                                                               | 2.6×10 <sup>-3</sup>                      | 0.1                                  | 50 °C, 100 % RH                            | 3         |
| [Eu <sub>4</sub> (H <sub>2</sub> O) <sub>3</sub> ]·2H <sub>2</sub> O (L = N-phenyl-N'-phenyl bicyclo [2,2,2]-oct-7-ene-2,3,5,6-tetracarboxdiimide tetracarboxylic acid) | 1.6×10 <sup>-5</sup>                      | 0.91                                 | 75 °C, 97% RH                              | 4         |
| Eu <sub>2</sub> (CO <sub>3</sub> )(ox) <sub>2</sub> (H <sub>2</sub> O) <sub>2</sub> ·4H <sub>2</sub> O (ox = oxalate)                                                   | 2.08×10 <sup>-3</sup>                     | 0.47 (25–90 °C)<br>0.26 (100–150 °C) | 150 °C                                     | 5         |
| K <sub>2</sub> (H <sub>2</sub> adp)[Zn <sub>2</sub> (ox) <sub>3</sub> ]·3H <sub>2</sub> O                                                                               | 1.2×10 <sup>-4</sup>                      | 0.45                                 | 98% RH                                     | 6         |
| Cu <sub>3</sub> [Co(CN) <sub>6</sub> ] <sub>2</sub> ·nH <sub>2</sub> O                                                                                                  | 2.57×10 <sup>-5</sup>                     | 1.21                                 | 27 °C, 100 % RH                            | 7         |
| UiO–66                                                                                                                                                                  | 6.93×10 <sup>-3</sup>                     | 0.22                                 | 65 °C, 95 % RH                             | 8         |
| [Zn( <i>l</i> -L <sub>Cl</sub> )(Cl)]·H <sub>2</sub> O L <sub>Cl</sub> =3-methyl-2-(pyridin-4-ylmethylamino)-butanoic acid                                              | 4.45×10 <sup>-5</sup>                     | 0.35                                 | 30 °C, 98 % RH                             | 9         |
| HKUST-1-H <sub>2</sub> O                                                                                                                                                | 1.5×10 <sup>-5</sup>                      | n/a                                  | RT, methanol vapor                         | 10        |
| CMOF-3                                                                                                                                                                  | 3.5×10 <sup>-5</sup>                      | 0.17                                 | RT, 98 % RH                                | 11        |

## References:

- [1] C. Dey, T. Kundu and R. Banerjee, *Chem. Commun.*, 2012, **48**, 266.
- [2] M. Sadakiyo, T. Yamada and H. Kitagawa, *J. Am. Chem. Soc.*, 2009, **131**, 9906.
- [3] S.-i. Ohkoshi, K. Nakagawa, K. Tomono, K. Imoto, Y. Tsunobuchi and H. Tokoro, *J. Am. Chem. Soc.*, 2010, **132**, 6620.
- [4] M. Zhu, Z.-M. Hao, X.-Z. Song, X. Meng, S.-N. Zhao, S.-Y. Song and H.-J. Zhang, *Chem. Commun.*, 2014, **50**, 1912.
- [5] Q. Tang, Y. Liu, S. Liu, D. He, J. Miao, X. Wang, G. Yang, Z. Shi and Z. Zheng, *J. Am. Chem. Soc.*, 2014, **136**, 12444.
- [6] M. Sadakiyo, T. Yamada and H. Kitagawa, *J. Am. Chem. Soc.*, 2014, **136**, 13166.
- [7] C. Xiao, Z. Chu, X.-M. Ren, T.-Y. Chen and W. Jin, *Chem. Commun.*, 2015, **51**, 7947.
- [8] J. M. Taylor, S. Dekura, R. Ikeda and H. Kitagawa, *Chem. Mater.*, 2015, **27**, 2286.
- [9] S. C. Sahoo, T. Kundu and R. Banerjee, *J. Am. Chem. Soc.*, 2011, **133**, 17950.
- [10] N. C. Jeong, B. Samanta, C. Y. Lee, O. K. Farha and J. T. Hupp, *J. Am. Chem. Soc.*, 2011, **134**, 51.
- [11] J. M. Taylor, R. K. Mah, I. L. Moudrakovski, C. I. Ratcliffe, R. Vaidhyanathan and G. K. Shimizu, *J. Am. Chem. Soc.*, 2010, **132**, 14055.
